# Supplementary material for: Pepper CaREL1, a ubiquitin E3 ligase, regulates drought tolerance via the ABA-signalling pathway
Source: PubMed Central journal article supplement (PMC5428412; doi:10.1038/s41598-017-00490-4), 2017-03-28
Supplement: 41598_2017_490_MOESM1_ESM.pdf [file 41598_2017_490_MOESM1_ESM.pdf]

## **Supplementary data**

### **Pepper CaREL1, a ubiquitin E3 ligase, regulates drought tolerance via the ABA-signalling pathway**

Chae Woo Lim, Chanmi Park, Jung-Hyun Kim, Hyunhee Joo,  
Eunji Hong, Sung Chul Lee

Supplementary Table S1. Sequences of primers used in this study

| Primer name                         | Primer sequence (5'-3')                                                                             |
|-------------------------------------|-----------------------------------------------------------------------------------------------------|
| For cloning                         |                                                                                                     |
| <i>CaREL1</i>                       | Forward: ATGGGTAATTGTTGCTGCTG<br>Reverse: TCCATCGATTGCAGGGTTA                                       |
| <i>CaREL1<sup>C205S/C208S</sup></i> | Forward: CGTTTCCTGATCACTGACGGGGCTGGTTTCACCTTCTCT<br>Reverse: AGAGAAGTGAAACCAGCCCCGTCAGTGATCAGGAAACG |
| For RT-PCR                          |                                                                                                     |
| <i>CaREL1</i>                       | Forward: CTCGAGCATCTCATCATGTCACAGC<br>Reverse: TCTAGAAGTTTCACTGTTTGTTTCTTGA                         |
| <i>CaACT1</i>                       | Forward: GACGTGACCTAACTGATAACCTGAT<br>Reverse: CTCTCAGCACCAATGGTAATAACTT                            |
| <i>Actin8</i>                       | Forward: CAACTATGTTCTCAGGTATTGCAGA<br>Reverse: GTCATGGAAACGATGTCTCTTTAGT                            |
| <i>NCED3</i>                        | Forward: ACATGGAAATCGGAGTTACAGATAG<br>Reverse: AGAAACAACAAACAAGAAACAGAGC                            |
| <i>DREB2A</i>                       | Forward: CTACAAAGCCTCAACTACGGAATAC<br>Reverse: AAACCTCGGATAGAGAATCAACAGTC                           |
| <i>RAB18</i>                        | Forward: GGAAGAAGGGAATAACACAAAAGAT<br>Reverse: GCGTTACAAACCCTCATTATTTTTTA                           |
| <i>RD20</i>                         | Forward: TGGTTTCTATCTAAAGAAGCTGTG<br>Reverse: ATACAAATCCCCAACTGAATAACA                              |
| <i>RD29B</i>                        | Forward: GTTGAAGAGTCTCCACAATCACTTG<br>Reverse: ATACAAATCCCCAACTGAATAACA                             |
| <i>RD29A</i>                        | Forward: CACAATCACTTGGCTCCACTGTTG<br>Reverse: ACCTAGTAGCTGGTATGGAGGAACT                             |
| <i>KIN2</i>                         | Forward: TGTTAACTTCGTGAAGGACAAGAC<br>Reverse: ACAACAACAAGTACGATGAGTACGA                             |
| <i>ABI1</i>                         | Forward: GTTTGGGATGTAATGACGGATG<br>Reverse: TGAAGTGAAGGCAGAGAGGGTCC                                 |
| <i>ERD1</i>                         | Forward: CCACCGACTCCTCTCTGCTT<br>Reverse: AAGGGAGATTCCGAGATATGAAGA                                  |

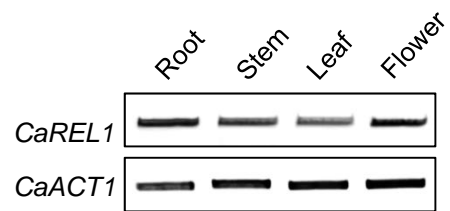

**Supplementary Figure S1.** RT-PCR analysis of *CaREL1* expression in various tissues of pepper plants.

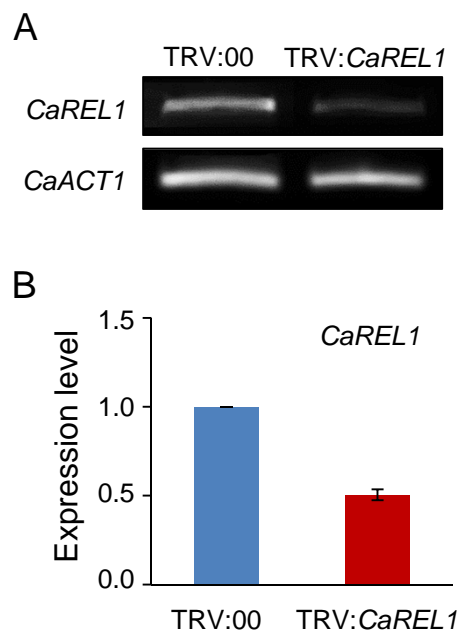

**Supplementary Figure S2.** RT-PCR (A) and qRT-PCR (B) analysis of *CaREL1* expression in the leaves of pepper plants transfected with the empty vector control (TRV:00) or *CaREL1*-silenced constructs (TRV:*CaREL1*). The expression levels were measured 0 h after detachment. The *Actin1* gene was used as an internal control..

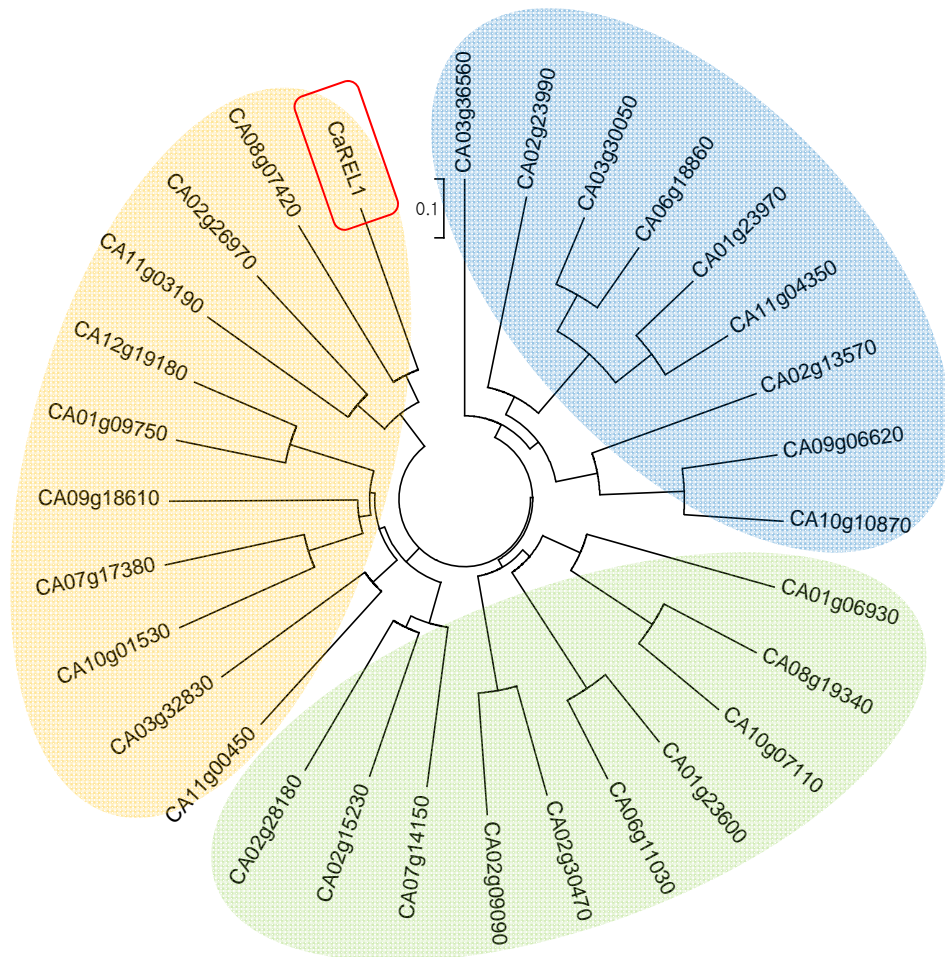

**Supplementary Figure S3.** Multiple alignment of amino acids in the CaREL1 protein and its homologous pepper proteins was performed using ClustalW2.
